# Supplementary material for: Accurate quantification of carboplatin adducts with serum proteins by monolithic chromatography coupled to ICPMS with isotope dilution analysis
Source: Royal Society of Chemistry journal article supplement (doi:10.1039/c8ja00409a), 2019-01-01

## **Electronic Supplementary Information**

### **ACCURATE QUANTIFICATION OF CARBOPLATIN ADDUCTS WITH SERUM PROTEINS BY MONOLITHIC CHROMATOGRAPHY COUPLED TO ICPMS WITH ISOTOPE DILUTION ANALYSIS**

Raquel Larios<sup>1,2</sup>, M. Estela del Castillo Busto<sup>1</sup>, Daniel Garcia-Sar<sup>1,3</sup>,  
Christian Ward-Deitrich<sup>1</sup> and Heidi Goenaga-Infante<sup>1\*</sup>

<sup>1</sup>LGC Limited, Queens Road, Teddington, Middlesex TW11 0LY, UK

<sup>2</sup>Agilent Technologies, Calle Jose Echegaray, 8, 28232 Las Rozas, Madrid, Spain

<sup>3</sup>AGQ Labs, Carretera Castilblanco A-433, Km. 24, 3, 41220 Burguillos, Sevilla, Spain

\* Corresponding author: Heidi.Goenaga-Infante@lgcgroup.com

**Figure ESI-1.** Fractionation of whole blood incubated with cisplatin

**Figure ESI-2.** Workflow for calculation of reaction yields of incubation of proteins standards with carboplatin using different approaches (A and B).

**Figure ESI-3.** Preparation and characterization of <sup>nat</sup>carboplatin-HSA calibrant and <sup>194</sup>carboplatin-HSA spike

**Figure ESI-4.** Incubation of ERM®- DA470k/IFCC serum with carboplatin and Double Species-specific IDA HPLC-ICPMS for quantification of Pt-HSA adducts in the model sample

**Figure ESI-1.** Fractionation of whole blood incubated with cisplatin

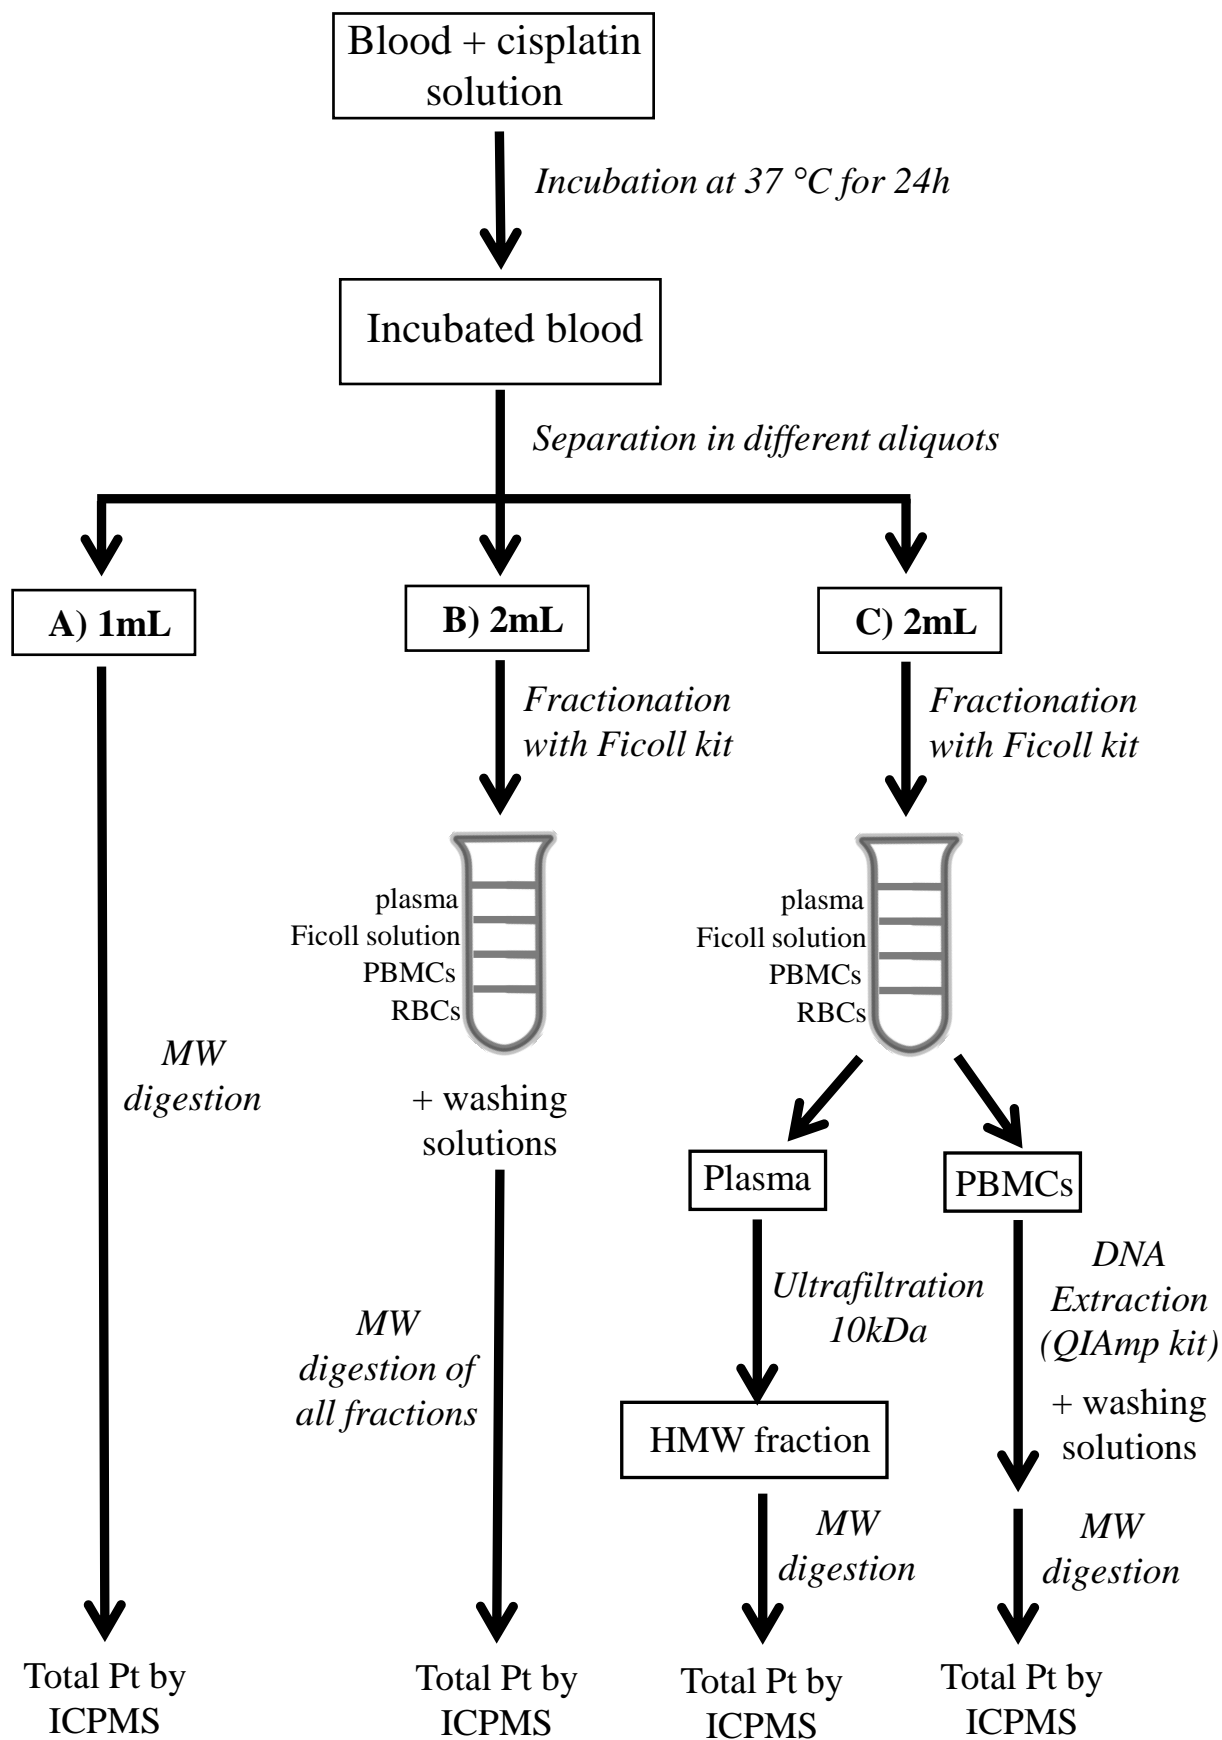

**Figure ESI-2.** Workflow for calculation of reaction yields of incubation of proteins standards with carboplatin using different approaches (A and B).

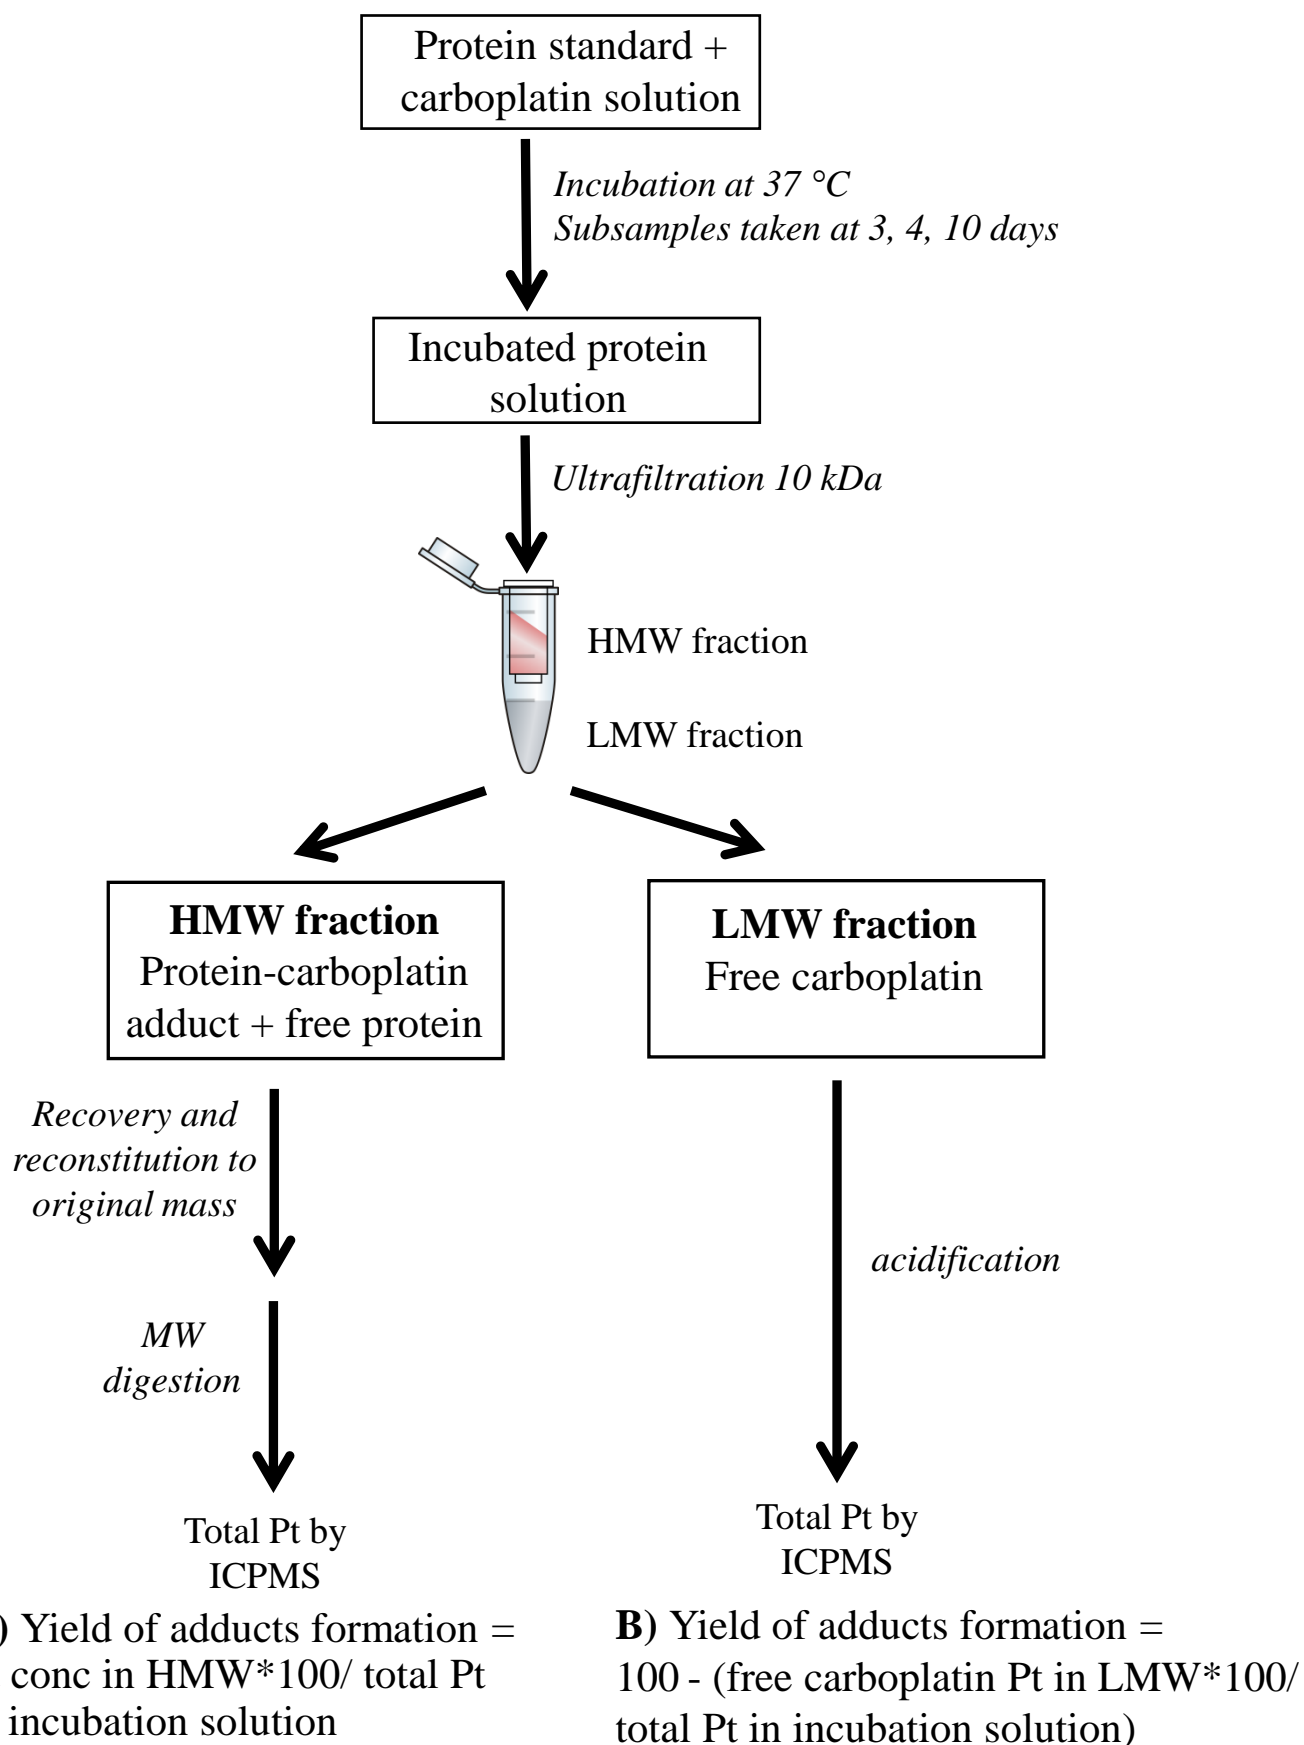

**Figure ESI-3.** Preparation and characterization of  $^{nat}$ carboplatin-HSA calibrant and  $^{194}$ carboplatin-HSA spike

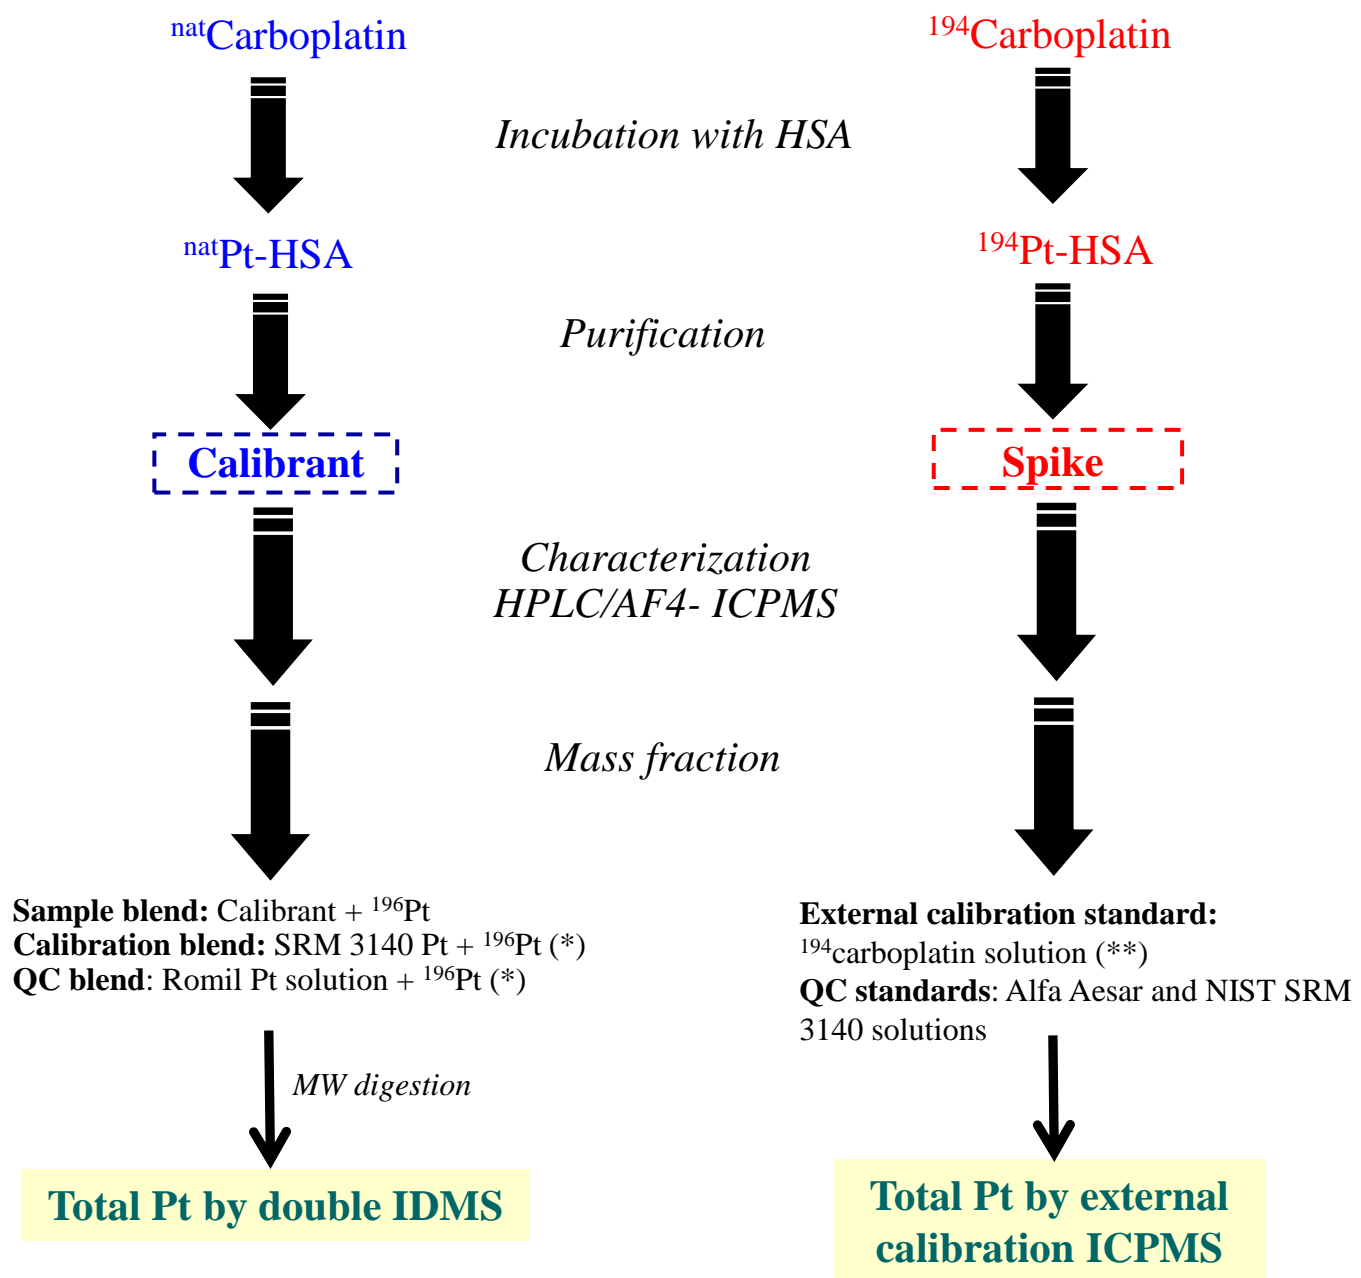

(\*) Calibration and QC blends were analyzed undigested to calculate recovery of MW digestion process

(\*\*)  $^{194}\text{carboplatin}$  solution previously characterized in total Pt content by external calibration ICP-OES

**Figure ESI-4.** Incubation of ERM®- DA470k/IFCC serum with carboplatin and Double Species-specific IDA HPLC-ICPMS for quantification of Pt-HSA adducts in the model sample

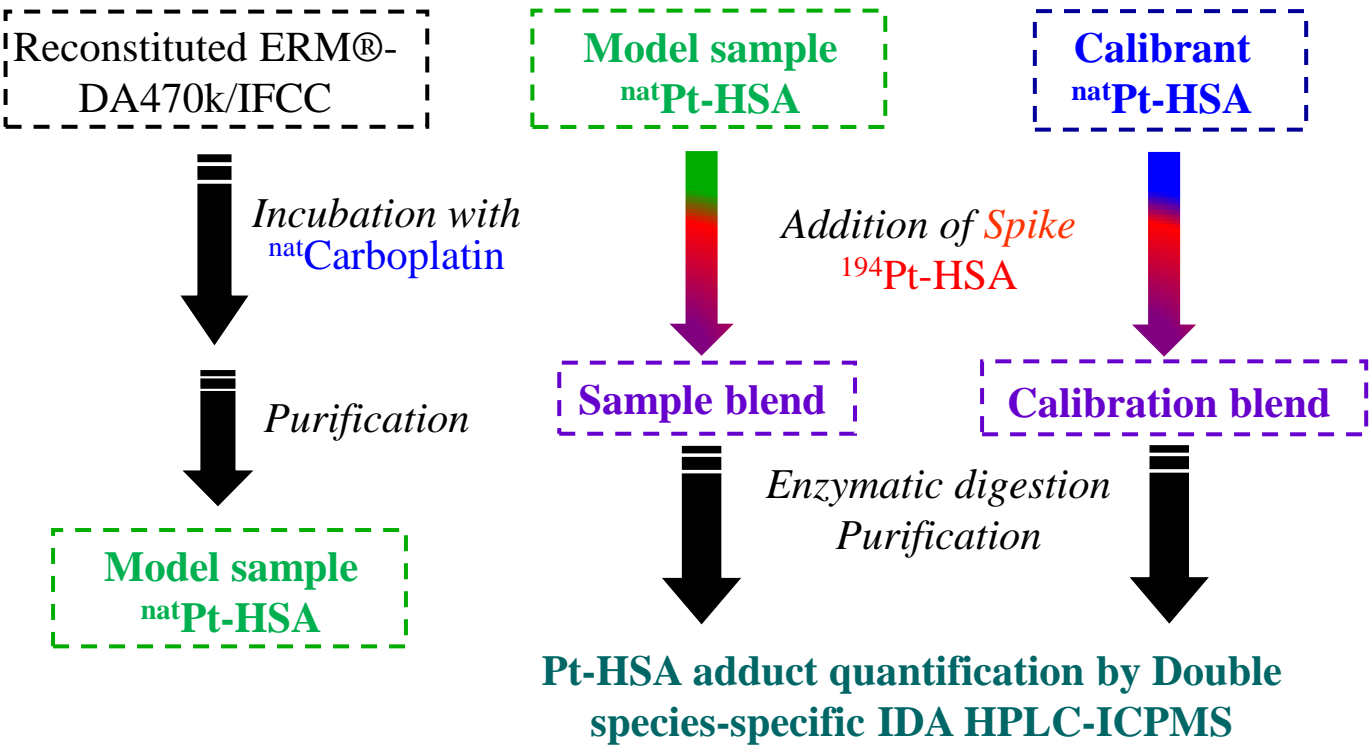

Supplement: c8ja00409a1.pdf [file c8ja00409a1.pdf]
